# Supplementary material for: Fitness factor genes conserved within the multi-species core genome of Gram-negative Enterobacterales species contribute to bacteremia pathogenesis
Source: PubMed Central journal article supplement (PMC11376589; doi:10.1371/journal.ppat.1012495), 2024-08-23
Supplement: ppat.1012495.s001.pdf [file ppat.1012495.s001.pdf]

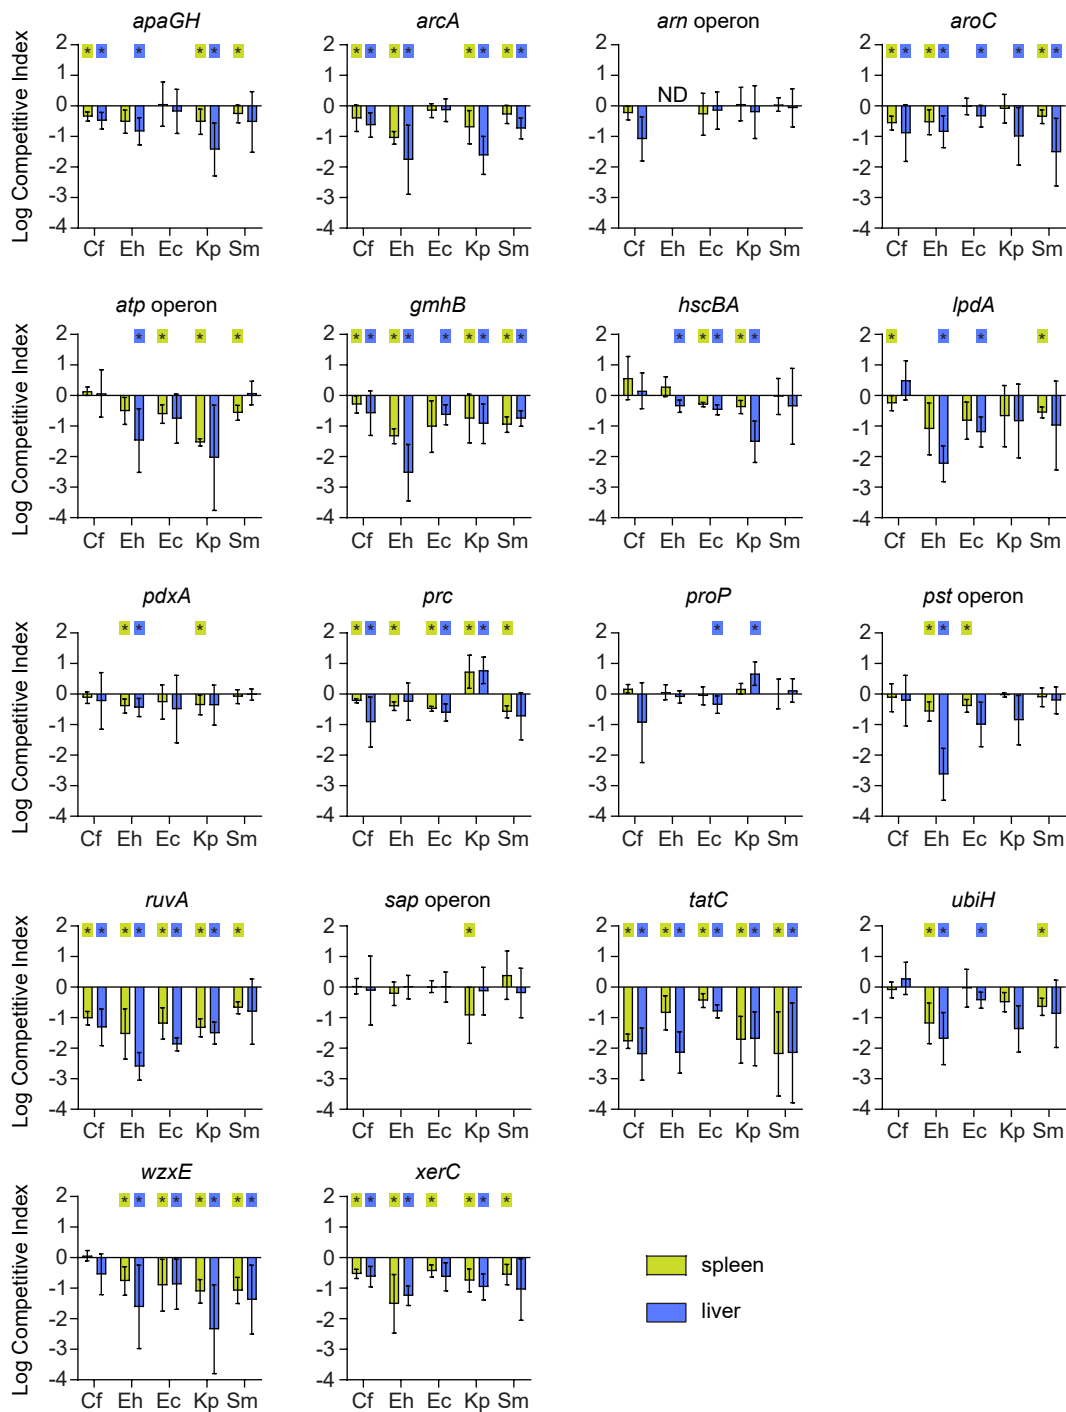

**Supplemental Fig 1. Competitive Indices  $\pm$  Standard Deviations in Spleen and Liver from murine tail vein cochallenges.** Fitness gene mutants were competed with wild-type bacteria in a TVI murine bacteremia model. Mice were sacrificed and bacteria were enumerated by CFU from spleen and liver homogenates 24 h after inoculation (Table 3 and 4). Bars represent the mean of log-transformed competitive indices  $\pm$  standard deviation. False discovery rates were calculated for each species independently and q values of  $< 0.05$  are indicated by an asterisk. Abbreviations: Cf, *C. freundii*; Eh, *E. hormaechei*; Ec, *E. coli*; Kp, *K. pneumoniae*; Sm, *S. marcescens*; ND, not determined.
