# Supplementary material for: Fitness factor genes conserved within the multi-species core genome of Gram-negative Enterobacterales species contribute to bacteremia pathogenesis
Source: PubMed Central journal article supplement (PMC11376589; doi:10.1371/journal.ppat.1012495), 2024-08-23
Supplement: ppat.1012495.s002.pdf [file ppat.1012495.s002.pdf]

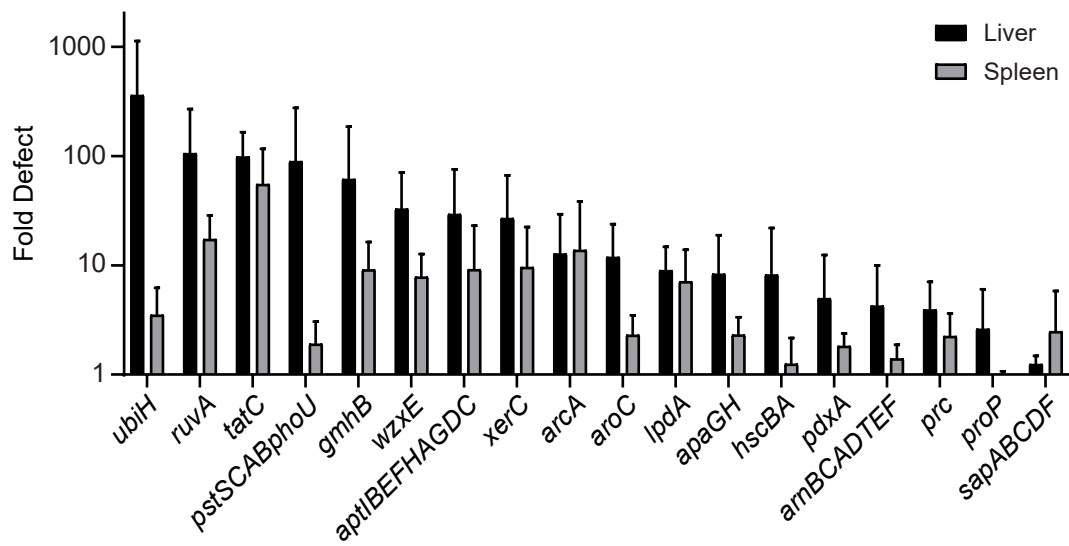

**Supplemental Fig 2. Fold-defects of fitness gene mutants as compared to wild-type strains in the murine model of bacteremia.** Competitive indices in Table 3 and Table 4 have been converted to fold-defects, averaged for all species, and depicted separately for liver and spleen. Bars represent standard deviations.
