# Supplementary material for: Fitness factor genes conserved within the multi-species core genome of Gram-negative Enterobacterales species contribute to bacteremia pathogenesis
Source: PubMed Central journal article supplement (PMC11376589; doi:10.1371/journal.ppat.1012495), 2024-08-23
Supplement: ppat.1012495.s003.pdf [file ppat.1012495.s003.pdf]

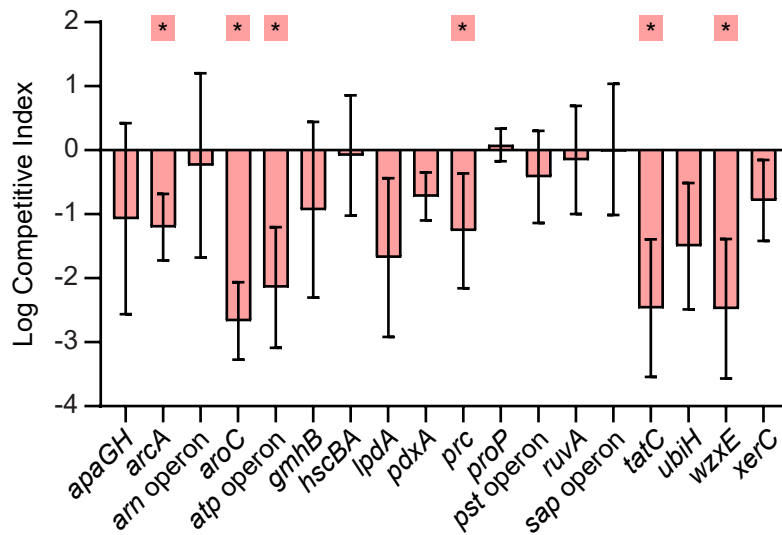

**Supplementary Fig 3. Competitive Indices  $\pm$  Standard Deviations for *S. marcescens* UMH9 in the kidney following murine tail vein injection cochallenges.** Fitness gene mutants were competed with wild-type *S. marcescens* in a TVI murine bacteremia model. Mice were sacrificed and bacteria were enumerated by CFU from kidney homogenates 24 h after inoculation (Table 5). Bars represent the mean of log-transformed competitive indices  $\pm$  standard deviation. False discovery rates resulting in q values of  $<0.05$  are indicated by an asterisk.
