# Supplementary material for: Fitness factor genes conserved within the multi-species core genome of Gram-negative Enterobacterales species contribute to bacteremia pathogenesis
Source: PubMed Central journal article supplement (PMC11376589; doi:10.1371/journal.ppat.1012495), 2024-08-23
Supplement: ppat.1012495.s004.pdf [file ppat.1012495.s004.pdf]

**Supplemental Fig. 4. Growth characteristics of bacteremia fitness mutants.** A-E. Relative growth rates (mutant/wild-type) and doubling times were calculated from the maximal specific growth rate in exponential phase for each mutant and wild-type strain. The statistical significance of relative growth rates was assessed by one-way ANOVA with Dunnett's multiple comparisons test against the hypothetical value of 1 representing wild-type. Adjusted P values are indicated by asterisks: \*,  $p < 0.05$ ; \*\*,  $p < 0.01$ ; \*\*\*,  $p < 0.001$ ; \*\*\*\*,  $p < 0.0001$ . Bars represent the means from three biological replicates  $\pm$  the standard deviation. Wild-type controls from independent experimental plates were included for each species and set of mutants, as shown in doubling time calculations.
