# Supplementary material for: Fitness factor genes conserved within the multi-species core genome of Gram-negative Enterobacterales species contribute to bacteremia pathogenesis
Source: PubMed Central journal article supplement (PMC11376589; doi:10.1371/journal.ppat.1012495), 2024-08-23
Supplement: ppat.1012495.s005.pdf [file ppat.1012495.s005.pdf]

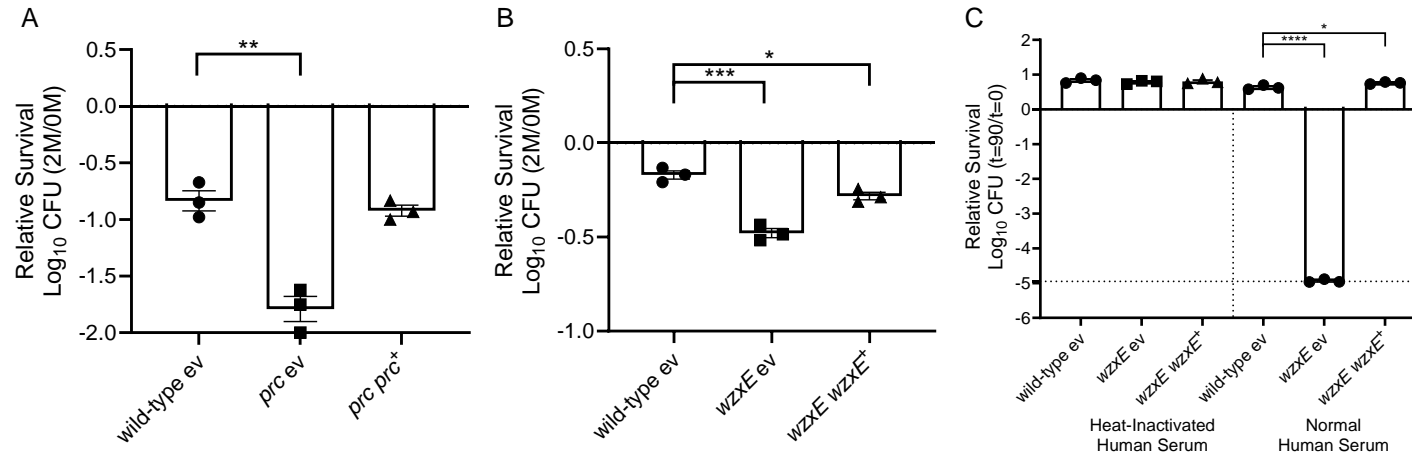

**Supplementary Fig 5. Complementation of *C. freundii* UMH14 *prc* mutant and *K. pneumoniae* KPPR1 *wzxE* (Enterobacterial Common Antigen) mutant.** In the Osmotic Stress Assay, **(A)**  $1 \times 10^7$  CFU/mL *C. freundii* UMH14 wild type strain, its *prc* mutant, and its complemented mutant and **(B)** *K. pneumoniae* KPPR1 wild type strain, its *wzxE* mutant, and its complemented mutant were incubated with 0M or 2M D-sorbitol in PBS to induce osmotic stress for 30 min. Individual CFUs were determined after 30-minute incubation. Bacterial viability was calculated relative to 0M sorbitol. In the Serum Resistance Assay **(C)**,  $1 \times 10^7$  CFU/mL of *K. pneumoniae* KPPR1 wild type strain, its *wzxE* mutant, and its complemented mutant were incubated for 90 min at 37°C with heat-inactivated human serum (left) or 90% pooled human serum (right) to assay for complement-mediated killing. Viability at t=90 min was calculated relative to t=0 min with statistical differences in susceptibility to heat-inactivated human serum or normal human serum. Data are presented as the mean  $\pm$  SEM and are representative of 3 independent experiments each with 3 biological replicates. Statistical significance was assessed by an unpaired *t*-test (\* $p < 0.05$ , \*\*\* $p < 0.001$ , \*\*\*\* $p < 0.0001$ ).
