# Supplementary material for: Fitness factor genes conserved within the multi-species core genome of Gram-negative Enterobacterales species contribute to bacteremia pathogenesis
Source: PubMed Central journal article supplement (PMC11376589; doi:10.1371/journal.ppat.1012495), 2024-08-23
Supplement: ppat.1012495.s006.pdf [file ppat.1012495.s006.pdf]

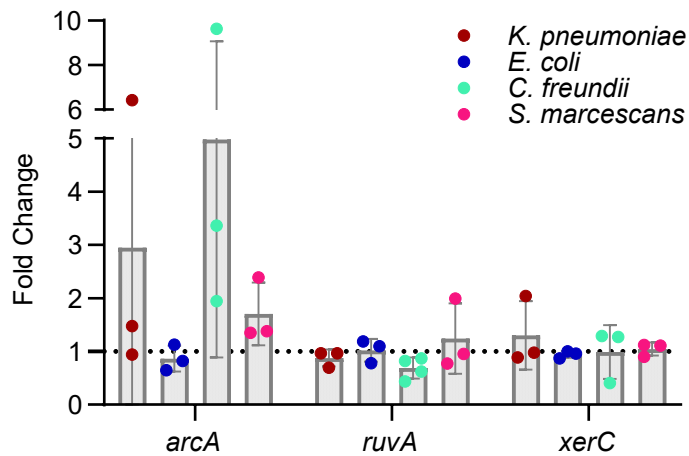

**Supplemental Fig 6. Oxidative stress by exposure to H<sub>2</sub>O<sub>2</sub>.** Bacterial strains with mutations in the genes *arcA*, *ruvA*, and *xerC* in each species of interest were exposed to hydrogen peroxide to measure resistance to oxidative stress. Percent survival was calculated by comparing bacterial survival at 2 hours to the input. Fold change was calculated by dividing percent survival of each mutant to its respective wild-type strain. No mutant conveyed statistically significant resistance to hydrogen peroxide stress as assessed by a one-sample t-test with a hypothetical value of 1, representing survival of the wild-type strain. Data are means of 3 independent experiments.
