# Supplementary material for: Fitness factor genes conserved within the multi-species core genome of Gram-negative Enterobacterales species contribute to bacteremia pathogenesis
Source: PubMed Central journal article supplement (PMC11376589; doi:10.1371/journal.ppat.1012495), 2024-08-23
Supplement: ppat.1012495.s007.pdf [file ppat.1012495.s007.pdf]

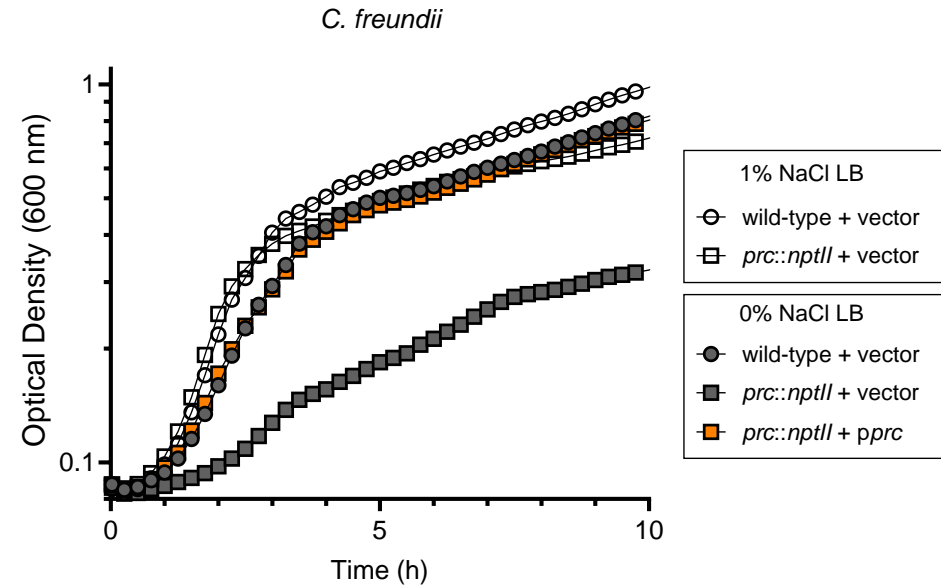

**Supplementary Fig 7. Complementation of a *C. freundii* UMH14 *prc* dependent growth defect in a hypotonic medium.** *C. freundii* UMH14 wild-type and *prc::nptII* grown aerobically in either LB medium (1% NaCl LB) or a hypotonic LB medium (0% NaCl LB) maintaining either the pBBR1MCS-5 empty vector plasmid (Vector) or a pBBR1MCS-5 derivative encoding the *prc* locus under control of its native promoter (*pprc*). Representative growth curves are the mean and standard deviation (small and obscured by symbols) of technical triplicate wells derived from OD<sub>600</sub> measurements taken every 15 m for 10 h in a plate reader.
