# Supplementary material for: Fitness factor genes conserved within the multi-species core genome of Gram-negative Enterobacterales species contribute to bacteremia pathogenesis
Source: PubMed Central journal article supplement (PMC11376589; doi:10.1371/journal.ppat.1012495), 2024-08-23
Supplement: ppat.1012495.s008.pdf [file ppat.1012495.s008.pdf]

## Supplemental Table 1. Primer sequences used for construction of prioritized fitness gene mutants.

| Name                             | Sequence (5'-3')                                                         |
|----------------------------------|--------------------------------------------------------------------------|
| SM <i>atp1BEFHAGDC</i> KO F      | GATCGCTCAAATGCTAAAGACGGTTTTGGTTGACCATCGGCTATAAATCAgTGTAGGCTGGAGCTGCTTC   |
| SM <i>atp1BEFHAGDC</i> KO R      | CCCgATATCAGGGTTATACACCACACCGCCCGCTGGCTGAAATGCTACATATGAATATCCTCCTTAGT     |
| SM <i>atp1BEFHAGDC</i> confirm F | CGTTCGACGGCGTGTATCAGC                                                    |
| SM <i>atp1BEFHAGDC</i> confirm R | CGTCCAGCTTGACCGTCAGC                                                     |
| SM <i>arnBCADTEF</i> KO F        | TTAAGGTTTAGTTAAGCTTGCGGCCCTTACATTGTGAGTTAATCCACGGAAGTGTAGGCTGGAGCTGCTTC  |
| SM <i>arnBCADTEF</i> KO R        | CCGGCACCACGTAAGGAGAGCGCTATTTGGCGTTAATTTATCTCCCGCACCATATGAATATCCTCCTTAGT  |
| SM <i>arnBCADTEF</i> confirm F   | TTATCTCAGCCAGCAACAGC                                                     |
| SM <i>arnBCADTEF</i> confirm R   | GTCGTTGGTATCGTAAATGC                                                     |
| SM <i>gmhB</i> KO F              | GGTAAACATCGCATACTGTACAGCGTATACAGGCCCTCAGGAGCAAAGCGGTgTGTAGGCTGGAGCTGCTTC |
| SM <i>gmhB</i> KO R              | TCTGACCGCTCACTATTATTGTAACGCCTATTAACCCCGCTTTTTGATCATATGAATATCCTCCTTAGT    |
| SM <i>gmhB</i> confirm F         | TGGCTTCATCGCACAGCAGC                                                     |
| SM <i>gmhB</i> confirm R         | GCTGCTGGCACGGAGTTAGC                                                     |
| SM <i>ubiH</i> KO F              | cgccgatccatcgaggctttgatgcccggccaagtaacggaatgagcGTGTAGGCTGGAGCTGCTTC      |
| SM <i>ubiH</i> KO R              | cgattctgtgtcaactccaccgcccagcgtgctggcgaagcCATATGAATATCCTCCTTAGT           |
| SM <i>ubiH</i> confirm F         | gtacgacattgtctggcgt                                                      |
| SM <i>ubiH</i> confirm R         | gtaatcagcgtgatgtccgaca                                                   |
| SM <i>wzxE</i> KO F              | CAATCAGCGTACGGTAATCAATACCATCCTGAGTTTCTTTCCTGATATGgTGTAGGCTGGAGCTGCTTC    |
| SM <i>wzxE</i> KO R              | GATATCGGATCCCAGAACGTGAATCAGTGTGGTCATACTCGTCTACGATACATATGAATATCCTCCTTAGT  |
| SM <i>wzxE</i> confirm F         | GTTGCTGGTGGAAAGATGCCG                                                    |
| SM <i>wzxE</i> confirm R         | CGCTTCGATATGCCGATTGC                                                     |
| SM <i>ruvA</i> KO F              | atgcccgtcattctgcaggaggtaaatgataggtcgtctcagaggaGTGTAGGCTGGAGCTGCTTC       |
| SM <i>ruvA</i> KO R              | aggcgtcggctcaatcattatctacctcttagcggcctacaagcCATATGAATATCCTCCTTAGT        |
| SM <i>ruvA</i> confirm F         | ccagaatgtcgtcggatg                                                       |
| SM <i>ruvA</i> confirm R         | ttcgtggccacgatgttg                                                       |
| SM <i>aroC</i> KO F              | gcacggcggcctataacgataaaagactaacggaaggagccgtgatGTGTAGGCTGGAGCTGCTTC       |
| SM <i>aroC</i> KO R              | caggcccacatccagttttcatggcattaccagcggcagcctggaCATATGAATATCCTCCTTAGT       |
| SM <i>aroC</i> confirm F         | gctgctgatttgaagtg                                                        |
| SM <i>aroC</i> confirm R         | acctggtagttcgggtgagt                                                     |
| SM <i>pdxA</i> KO F              | cttacgtgaagatcctcgtggcagcgtgcacagcaataaacgctcGTGTAGGCTGGAGCTGCTTC        |
| SM <i>pdxA</i> KO R              | tggggactctgttattcattacaattaattatcatttaagtcgagCATATGAATATCCTCCTTAGT       |
| SM <i>pdxA</i> confirm F         | gaaagatcgctaccgc                                                         |
| SM <i>pdxA</i> confirm R         | cggagacaatgctatcgtg                                                      |
| SM <i>apaGH</i> KO F             | tggctgtcagccaatccggcggcagcaataaggagttgtcatgGTGTAGGCTGGAGCTGCTTC          |
| SM <i>apaGH</i> KO R             | gccctgcctccagcggagcccagtgccgaagcagatggtgtattcCATATGAATATCCTCCTTAGT       |
| SM <i>apaGH</i> confirm F        | ttcaaccagcggcggaaaac                                                     |
| SM <i>apaGH</i> confirm R        | cggactacaagcagatgttcg                                                    |
| SM <i>lpdA</i> KO F              | taaaaatgacgtctgaccgccggacaatcaattaaggagtcagtgGTGTAGGCTGGAGCTGCTTC        |
| SM <i>lpdA</i> KO R              | gccgctgttaaccggtcaaacaccagcagaattactctcttgctttCATATGAATATCCTCCTTAGT      |
| SM <i>lpdA</i> confirm F         | gccgctcgttgatgtaatg                                                      |
| SM <i>lpdA</i> confirm R         | tttgctgaatcgttgagcgc                                                     |

|                                  |                                                                                        |
|----------------------------------|----------------------------------------------------------------------------------------|
| SM <i>hscBA</i> KO F             | CTTGCCTCCCGCTTCCAGGATCTGCAGCGCCAAATTCACCCCGATCGTTTgTGTAGGCTGGAGCTGCTTCGaag             |
| SM <i>hscBA</i> KO R             | AATGGAAGCGTCCATCGCGCCGCGGCAAAATCTTGGCTTTGTGCATCTACATGAATATCCTCCTTAGTtct                |
| SM <i>hscBA</i> confirm F        | CTGGAATTTGTTGACGAAGC                                                                   |
| SM <i>hscBA</i> confirm R        | TATTGGTCGTACAGGGCTTC                                                                   |
| SM <i>sapABCDF</i> KO F          | CAGAGTGCATACACTAACGCTATTGCTATTAAACCCATGAGCCTCTATgTGTAGGCTGGAGCTGCTTC                   |
| SM <i>sapABCDF</i> KO R          | CGCAGCGGGTTTATTGCAGGCCAGGACGGGCCTCAAAAACGGCCGCGTCCATATGAATATCCTCCTTAGT                 |
| SM <i>sapABCDF</i> confirm F     | TCGTTACATATCCCCTTGC                                                                    |
| SM <i>sapABCDF</i> confirm R     | CGAAGGCTGTTTCATCAGTGC                                                                  |
| SM <i>prc</i> KO F               | acttgcagcttgatagcggagccaaccagcgaacaattcGTGAGGCTGGAGCTGCTTC                             |
| SM <i>prc</i> KO R               | tgctgctgagcggccgatctttccagatgagccagctccagCATATGAATATCCTCCTTAGT                         |
| SM <i>prc</i> confirm F          | agtcagagcaggcaagag                                                                     |
| SM <i>prc</i> confirm R          | ataaattgtcaggcagcg                                                                     |
| SM <i>xerC</i> KO F              | tccaagtagaagcggcaactcagcccgtgacgcagctGTGAGGCTGGAGCTGCTTC                               |
| SM <i>xerC</i> KO R              | acacgttcgagatgttgaagtcgaggtgggtataatCATATGAATATCCTCCTTAGT                              |
| SM <i>xerC</i> confirm F         | gcgatacgaacactatcag                                                                    |
| SM <i>xerC</i> confirm R         | tgacgtcgtgtagatctcc                                                                    |
| SM <i>proP</i> KO F              | acgcttcaagaacaagaataattcaaggatgattatgGTGAGGCTGGAGCTGCTTC                               |
| SM <i>proP</i> KO R              | cgggtgctttgttttgcgcgagcaatccagctgggatgCATATGAATATCCTCCTTAGT                            |
| SM <i>proP</i> confirm F         | taacctggcataaacgagc                                                                    |
| SM <i>proP</i> confirm R         | atggaaaggtccatcgtgctc                                                                  |
| SM <i>pstSCABphoU</i> KO F       | ATTAAAACGACTCGAAGTCGATTTTAAATATCCCATTAGGAGGATTATGgTGAGGCTGGAGCTGCTTC                   |
| SM <i>pstSCABphoU</i> KO R       | ACCCGCGCTTTGAAGGATATTACCCGAAAGGGTCAGTCGGCTTTGTCGTCATATGAATATCCTCCTTAGT                 |
| SM <i>pstSCABphoU</i> confirm F  | GCAGCTGTGTCTTACCAGC                                                                    |
| SM <i>pstSCABphoU</i> confirm R  | AGTTCACTTCTTGCGCGC                                                                     |
| SM <i>SufI</i> F                 | AGATTAAGAGGAGAAAAGAGTCCcATGCTACTCAGTCGACGTCA                                           |
| SM <i>SufI</i> R                 | ccctctgcaaggcagtagcGGGTAATGGGGTCTGCGTTC                                                |
| Dasher GFP F                     | gctactgccttgacagaggg                                                                   |
| Dasher GFP R                     | TgGGACTCTTCTCCTCTTAAATCT                                                               |
| KP <i>atp/BEFHAGDC</i> KO F      | AAAGGACGTTTTATACGACACGCGACATACCTCAAAGGAGCAGGAGTAAAAACGTGATGGTGTAGGCTGGAGCTGCTTC        |
| KP <i>atp/BEFHAGDC</i> KO R      | CCAGCCTGGAACCCAGACTGGCTTTTTACGTTCAAGCCGGTGTACATCGCTTTTTTGGTCATATGAATATCCTCCTTAGT       |
| KP <i>atp/BEFHAGDC</i> confirm F | GATGCTTGACTCTTCGTC                                                                     |
| KP <i>atp/BEFHAGDC</i> confirm R | TTCACTTCATCCGCTC                                                                       |
| KP <i>amBCADTEF</i> KO F         | ATATTTTATTCTAACGACCCAGATTGTCGCTGGGTCATCTACAGAACAGGATGATGATGGTGTAGGCTGGAGCTGCTTC        |
| KP <i>amBCADTEF</i> KO R         | GATCTGTCTGGCCCGGGCCGTCCAAAAGCCGGCTCCCGGCTAGCGCGCTTACCAGGCATATGAATATCCTCCTTAGT          |
| KP <i>amBCADTEF</i> confirm F    | GCCGTGCTGAACACTACT                                                                     |
| KP <i>amBCADTEF</i> confirm R    | GCCATTAACCAGCGTC                                                                       |
| KP <i>wzxE</i> KO F              | CAATCTGTCTGTGGTGAACCAGCGGACGGTGATTAACCTCGCTGCTGAGCTACTTCTCCTGATATGGTGTAGGCTGGAGCTGCTTC |
| KP <i>wzxE</i> KO R              | CTGGTTATGATCGGGATATCCGATCCCAGTACATGTATCAGTGTGTCATGCCGCTTTACGCCACATATGAATATCCTCCTTAGT   |
| KP <i>wzxE</i> confirm F         | CATTACATCCCCTGCACAG                                                                    |
| KP <i>wzxE</i> confirm R         | CAGTTGCTGTTAAAGAACC                                                                    |
| KP <i>ruvA</i> KO F              | ATCCAGCCTTTTTTATGATACCCAGACTTAGACCATAACGCAGGAGCCCCACGTGGTGTAGGCTGGAGCTGCTTC            |

|                                 |                                                                                         |
|---------------------------------|-----------------------------------------------------------------------------------------|
| KP <i>ruvA</i> KO R             | TGTCCTGCCGATACCAGCCGGTCTGCTTCAATCATCCCTTACCTCACAACGCAGCGCGCAGCATATGAATATCCTCCTTAGT      |
| KP <i>ruvA</i> confirm F        | TCAGATCAGCGAGACC                                                                        |
| KP <i>ruvA</i> confirm R        | CGACATACTCTGCCAGCA                                                                      |
| KP <i>apaGH</i> KO F            | GTACTIONCTGATGGCCAACTGGCTGTGACAATCTGCCAACGAAGGAGAGCTAACCATGGTGTAGGCTGGAGCTGCTTC         |
| KP <i>apaGH</i> KO R            | GGTAGCCCGGATAAGGCGCAACGCGCCGCTATCCGGGAAGAGTCAGGACGCGACGGCTCCATATGAATATCCTCCTTAGT        |
| KP <i>apaGH</i> confirm F       | GTATCCGGTCAAAGAGATCC                                                                    |
| KP <i>apaGH</i> confirm R       | TAGGTCCGGTAAGGCGTTAG                                                                    |
| KP <i>lpdA</i> KO F             | ACTTGGGCGTAAGAATAATAGCGTCAGACCCCGCCGGATATAAATTACAGAGGTCATGATGGTGTAGGCTGGAGCTGCTTC       |
| KP <i>lpdA</i> KO R             | CGGCTCCCGGAGCCGCTTATGCTTTTTCTGAAAGAAAAGTTACTTTTTCTCGCTTTCATATGAATATCCTCCTTAGT           |
| KP <i>lpdA</i> confirm F        | ATACACGCGGATAGAACGTC                                                                    |
| KP <i>lpdA</i> confirm R        | GTAGCGGTTTATGAACAGTGAC                                                                  |
| KP <i>hscBA</i> KO F            | AACGTATAATCGGTACTCCTCAACCCACCGCGTCACGCCGCGTGGGGTTTTAATTTAGATGGTGTAGGCTGGAGCTGCTTC       |
| KP <i>hscBA</i> KO R            | GGGGCAGAAATACAATTTTTGGCATTAAAACTCGTCCACGGATTGGCTTTACGCGGATACGCATATGAATATCCTCCTTAGT      |
| KP <i>hscBA</i> confirm F       | TCAAAGATGAGTCCGGCTGC                                                                    |
| KP <i>hscBA</i> confirm R       | TCTCAGCTTCCACAACGATG                                                                    |
| KP <i>sapABCDF</i> KO F         | CGGTGGTGAAGTCTATTAATCTTAATAAGATAGAGTTCAGCTCTATAATCAAACAGAAAATATGGTGTAGGCTGGAGCTGCTTC    |
| KP <i>sapABCDF</i> KO R         | TGAATGACAAGGGCGCGTGAGGGCCGCCCTGCCGTTGCCTGCCAGCTATTTCCCGCTTTTGGCAGATATGAATATCCTCCTTAGT   |
| KP <i>sapABCDF</i> confirm F    | GTAAACCGCATTATCCTCAG                                                                    |
| KP <i>sapABCDF</i> confirm R    | CGATGTCTCATGGATAATAGG                                                                   |
| KP <i>prc</i> KO F              | GGTATGTCAATGATTGTACGCGCAGAACAACCTGGTGTCTGAAACGGAGCCGGGCCAGGCATGAGTGTAGGCTGGAGCTGCTTC    |
| KP <i>prc</i> KO R              | AACGCGCACAAAAAAGCGGCACCTCTCAGGGTCCCGTTAGCAACTTATTGTGCGCCGGCGGCATATGAATATCCTCCTTAGT      |
| KP <i>prc</i> confirm F         | CACCAAAGATGGCGTTCTGTG                                                                   |
| KP <i>prc</i> confirm R         | TTGTAGCATCTTGCTGACAG                                                                    |
| KP <i>xerC</i> KO F             | CAGCTGTTGACGAGATTGCCAGATGCTGCCCGCTGCTGGAGCGCTGGATTGAACGCGCATGGTGTAGGCTGGAGCTGCTTC       |
| KP <i>xerC</i> KO R             | GTCAAACGTCAGCGCGAAATCTGGCCAGAGTCCGGTAAAAACGATTATTTCCCGCTTTAGCCATATGAATATCCTCCTTAGT      |
| KP <i>xerC</i> confirm F        | GGGTGATGCTCTCAGCAGC                                                                     |
| KP <i>xerC</i> confirm R        | TGAGCGAAGGATGGTAGCTG                                                                    |
| KP <i>proP</i> KO F             | GCGAATGGCCTTGCCATTGGCGAAGAGCGTGCCTCAAGCGGAGTAGCAGAGAAAAATATGGTGTAGGCTGGAGCTGCTTC        |
| KP <i>proP</i> KO R             | AATGCCGCGGGGTTCCCGAGGCGCATGATTAACAGTAAAAACGGTTAGTCGTTGATACGCGGCATATGAATATCCTCCTTAGT     |
| KP <i>proP</i> confirm F        | AGCAATTCACCGCTCCTGAC                                                                    |
| KP <i>proP</i> confirm R        | TCCAGCAGTCGCTTCTACAG                                                                    |
| KP <i>pstSCABphoU</i> KO F      | TTGACCTATTTTGCTCACCATAGCCTCGAAACAATGATTTACGAATCCAGCAGGAGACATTATGGTGTAGGCTGGAGCTGCTTC    |
| KP <i>pstSCABphoU</i> KO R      | TATCTAATTCTGATAAATCCATTTACCAGAATTAGACAGAATGATTATTACTCTTTCCGGATCTTTCATATGAATATCCTCCTTAGT |
| KP <i>pstSCABphoU</i> confirm F | TACGAATCCAGCAGGA                                                                        |
| KP <i>pstSCABphoU</i> confirm R | GCGGGGTAACATATC                                                                         |
| KP <i>tatC</i> KO F             | gtccgctacggcgagttccccatttccccccgcatcgagtgataaacgtaaacatgGTGTAGGCTGGAGCTGCTTC            |
| KP <i>tatC</i> KO R             | tcgctccatattgccaacogccctgacggcggttggcggtattactctctctgctcCATATGAATATCCTCCTTAGT           |
| KP <i>tatC</i> confirm F        | taccatcttaatccggttg                                                                     |
| KP <i>tatC</i> confirm R        | gctcgccagtttctgcg                                                                       |
| KP <i>kan</i> insert confirm R  | ATGCTCTTCGTCCAGATCATC                                                                   |
| KP <i>ubiH</i> KO F             | TGGCCATCTCCGTTTGACCGCGGGCGCGCTGCCGTTCCACCTCATTGAAGCGCAGGATCCGCATGTGTAGGCTGGAGCTGCTTC    |

|                                |                                                                                       |
|--------------------------------|---------------------------------------------------------------------------------------|
| KP <i>ubiH</i> KO R            | ACGGGGAACCCACCAGGGTACGCTGCGCCAGCGCATCGCGCGCCGGGTAATAATCCAATGGGAATTAGCCATGGTCC         |
| KP <i>ubiH</i> confirm F       | GGCGAGATTGACGAGCTTAT                                                                  |
| KP <i>ubiH</i> confirm R       | CCACACTTCCATACCGTGATAG                                                                |
| KP <i>aroC</i> KO F            | ATGGCAGGAAATACAATTGGACAACCTTTTCGCGTCACTACCTTCGGCGAATCGCACGGTCTGGCGTGTAGGCTGGAGCTGCTTC |
| KP <i>aroC</i> KO R            | ATAAAGTGATCCATCAGAACGATCGCCAGCATCGCCTCAGCGATCGGTACGGCGCGGATGCCGACATGGGAATTAGCCATGGTCC |
| KP <i>aroC</i> confirm F       | CTTTATGCTGACCAAACAGCAG                                                                |
| KP <i>aroC</i> confirm R       | AGATCCGGATGACCGAAGTA                                                                  |
| EC <i>ruvA</i> KO F            | TATCCAGCATTTTTTATCATAACAGCATTGGCAGAGTGTAGGCTGGAGCTGCTTC                               |
| EC <i>ruvA</i> KO R            | AATCATCCTTTACCTCATAACGCGGCGGTAGGGCCATATGAATATCCTCCTTAGT                               |
| EC <i>ruvA</i> confirm F       | CACATTTCTTCGCTGAATATGTAAT                                                             |
| EC <i>ruvA</i> confirm R       | TGGCAAGCGTAGTTTTACCC                                                                  |
| EC <i>pdxA</i> KO F            | GCCAGCGCTACGTTAAAATCCTGAGCAACTAATGGTGTAGGCTGGAGCTGCTTC                                |
| EC <i>pdxA</i> KO R            | CTGGTGGACTCGATTATTCATTGGGTGTTAACAATCATATGAATATCCTCCTTAGT                              |
| EC <i>pdxA</i> confirm F       | GCTGGATACCCGTAATGTCG                                                                  |
| EC <i>pdxA</i> confirm R       | AAACAATGCTGTCGATCACG                                                                  |
| EC <i>apaGH</i> KO F           | AGAACGCGCCTTTGCAGGAGAGTTAACGATGATCAGTGTAGGCTGGAGCTGCTTC                               |
| EC <i>apaGH</i> KO R           | AGCATTAGATTTTATGCTCGACGGGATTTAAGACGCATATGAATATCCTCCTTAGT                              |
| EC <i>apaGH</i> confirm F      | CCTGTTTAGCGTCGAGGTGT                                                                  |
| EC <i>apaGH</i> confirm R      | CATGACGCATGAGACTGCAAC                                                                 |
| EC <i>lpdA</i> KO F            | TAATTTGCCGGATGTTCCGGCAAACGAAAAATTACTTCATATGAATATCCTCCTTAGT                            |
| EC <i>lpdA</i> KO R            | CCGCCGGAGATAAATATATAGAGGTCATGATGAGTGTAGGCTGGAGCTGCTTC                                 |
| EC <i>lpdA</i> confirm F       | CTTATCGGGCCTACACAAGC                                                                  |
| EC <i>lpdA</i> confirm R       | AAATCGGTTGCCGTTTGTT                                                                   |
| EC <i>sapABCD</i> KO F         | TGCTCCTCGTAAGTTGTTCTGTGAGTTATAGTTAGTGTAGGCTGGAGCTGCTTC                                |
| EC <i>sapABCD</i> KO R         | GAGGGGGCCTGTCAGGATGAGGTGCAAAACACTACATATGAATATCCTCCTTAGT                               |
| EC <i>sapABCD</i> confirm F    | TCCCGTACGCATTGATGAGA                                                                  |
| EC <i>sapABCD</i> confirm R    | ATTGCTCACGGTCTTATGCG                                                                  |
| EC <i>arnBCADTEF</i> KO F      | ACTCAGTAACGTGTTTTGTTGTTGGCAGGAAATCATATGAATATCCTCCTTAGT                                |
| EC <i>arnBCADTEF</i> KO R      | TGGACAGGTATTCAATGACGGATGGAAAAAATGGTGTAGGCTGGAGCTGCTTC                                 |
| EC <i>arnBCADTEF</i> confirm F | GGGGATTTACTCTCGCCTTT                                                                  |
| EC <i>arnBCADTEF</i> confirm R | TTGCCAAATGCAAAGCTAAA                                                                  |
| EC <i>prc</i> KO F             | CGGAGGCGGGCCAGGCATGAACATGTTTTTGGGTGTAGGCTGGAGCTGCTTC                                  |
| EC <i>prc</i> KO R             | AATCAGGCACAATTTCTGTGCCTGATTGATATTACATATGAATATCCTCCTTAGT                               |
| EC <i>prc</i> confirm F        | ACACCCCGTTTCTGACATT                                                                   |
| EC <i>prc</i> confirm R        | TGCGTAAGTCACCAGAAAGAC                                                                 |
| EC <i>proP</i> KO F            | AAATCGGCAATCTCGTGGTCAATATCATCGATTTTCATATGAATATCCTCCTTAGT                              |
| EC <i>proP</i> KO R            | GCGGAAATGGGCCAACTCTGCGAGGAAAGCTATGCGTGTAGGCTGGAGCTGCTTC                               |
| EC <i>proP</i> confirm F       | GGACCGGGTATTGATGAGAGT                                                                 |
| EC <i>proP</i> confirm R       | GGGCAATGGTCGAGGAAATC                                                                  |
| EC <i>pstSCABphoU</i> KO F     | ACAATGCTTTATGAATCCTCCAGGAGACATTATGGTGTAGGCTGGAGCTGCTTC                                |
| EC <i>pstSCABphoU</i> KO R     | AATAATTAATATTGGGATTTACTTGGTGAATTACATATGAATATCCTCCTTAGT                                |

|                                  |                                                              |
|----------------------------------|--------------------------------------------------------------|
| EC <i>pstSCABphoU</i> confirm F  | ATCCTGCCAACTCCATGTGA                                         |
| EC <i>pstSCABphoU</i> confirm R  | GCATGTTCCATAGCAAGGACCT                                       |
| EC <i>ECAoperon</i> KO F         | TCTGCTAATAATTTTCTCTGAGAGCATGCATTGTGGTGTAGGCTGGAGCTGCTTC      |
| EC <i>ECAoperon</i> KO R         | TTCGTCGCTTTACAAAGAGAGGAAAATCAGAGGTT                          |
| EC <i>ECAoperon</i> confirm F    | AGAAAATGTGGATCCTGCGC                                         |
| EC <i>ECAoperon</i> confirm R    | CCGCCATCCACATAAACCCAG                                        |
| EC <i>atp/BEFHAGDC</i> KO F      | atacctcgaaggagcaggagtgaaaaactgatgGTGTAGGCTGGAGCT             |
| EC <i>atp/BEFHAGDC</i> KO R      | tgctttcaagccggtgttacatcctttttggTCATATGAATATCCTCCTTAGT        |
| EC <i>atp/BEFHAGDC</i> confirm F | ACCGCTTTTTGATGCTTG                                           |
| EC <i>atp/BEFHAGDC</i> confirm R | TTCAGGACGGGTCAATAC                                           |
| EC <i>gmhB</i> KO F              | gcgtcacatgccttattaaggagctataaaaggTGTGTAGGCTGGAGCTGCTTC       |
| EC <i>gmhB</i> KO R              | cgctcatcttttatcatcaogccggttttgctCATATGAATATCCTCCTTAGT        |
| EC <i>gmhB</i> confirm F         | CAGACGTCTAAATCAATCAGG                                        |
| EC <i>gmhB</i> confirm R         | GATGGAGGCGCATTATAG                                           |
| EC <i>wzxE</i> KO F              | aattgcgacctgttgaactactctctcatalgGTGTAGGCTGGAGCTGCTTC         |
| EC <i>wzxE</i> KO R              | tacgtgaatcagtcagtcagtcagccgctacgccaCATATGAATATCCTCCTTAGT     |
| EC <i>wzxE</i> confirm F         | CTACACCACCAAGAGAG                                            |
| EC <i>wzxE</i> confirm R         | TCGTTGAAAACCGCAG                                             |
| EC <i>hscBA</i> KO F             | gttatcgccgcatcgagccctgagaatggtatGTGTAGGCTGGAGCTGCTTC         |
| EC <i>hscBA</i> KO R             | ataacaatctttggcatattaaacctcgtccaoggaCATATGAATATCCTCCTTAGT    |
| EC <i>hscBA</i> confirm F        | cgaaagctccacggtt                                             |
| EC <i>hscBA</i> confirm R        | caatctogataccgttacg                                          |
| EC <i>xerC</i> KO F              | ggcgcgttgattgaacgcatgaccgatttacacGTGTAGGCTGGAGCTGCTTC        |
| EC <i>xerC</i> KO R              | aaggccgtaaaaacgcattatccccctttggcCATATGAATATCCTCCTTAGT        |
| EC <i>xerC</i> confirm F         | gattgggtgtgtgct                                              |
| EC <i>xerC</i> confirm R         | tcggtgcgcaaaatca                                             |
| EC <i>tatC</i> KO F              | ccttccccctcgtcgatgataaacctgaaacatgGTGTAGGCTGGAGCTGCTTC       |
| EC <i>tatC</i> KO R              | ctgagggcggttgattttatctcagtttttcCATATGAATATCCTCCTTAGT         |
| EC <i>tatC</i> confirm F         | AACAGAAGCCAGAAACTAC                                          |
| EC <i>tatC</i> confirm R         | CGAGCTGGTCAAATTAAC                                           |
| EC <i>ubiH</i> KO F              | GGGCACGACGCTGGCGCTGGCTATTTCCCGGTTAAGTCACGTGTAGGCTGGAGCTGCTTC |
| EC <i>ubiH</i> KO R              | ACATCGCTGTGCTGGGGTAAATAATCCATCGTCATCAGCCATATGAATATCCTCCTTAGT |
| EC <i>ubiH</i> confirm F         | GAACCAGGGCTGTATATTGCG                                        |
| EC <i>ubiH</i> confirm R         | CATCCGCCGCCAGAGG                                             |
| EC <i>aroC</i> KO F              | AAAGATTAGTAAACACGCAAAACACAACAATAACGGAGCCGTGTAGGCTGGAGCTGCTTC |
| EC <i>aroC</i> KO R              | TTACCAGCGTGAATATCAGTCTCACATCGGCATTTTGCATATGAATATCCTCCTTAGT   |
| EC <i>aroC</i> confirm F         | GGCAGATTACCTCGTGATGA                                         |
| EC <i>aroC</i> confirm R         | TCAGCACCACGATACAGC                                           |
| EH <i>atp/BEFHAGDC</i> KO F1     | <b>cgaaaggagcaggag</b> taaaaactgtgcatgcatgcaattagctcaaaag    |
| EH <i>atp/BEFHAGDC</i> KO F2     | gttttatcagacacgcccatacct <b>cgaaaggagcaggag</b>              |
| EH <i>atp/BEFHAGDC</i> KO R1     | <b>gactggctttgtgctttc</b> aagccggtggacgatogaattggggatct      |

|                                  |                                                                |
|----------------------------------|----------------------------------------------------------------|
| EH <i>atp/BEFHAGDC</i> KO R2     | aaaaagccagccctgggatcca <b>gactggcttttgcttttc</b>               |
| EH <i>atp/BEFHAGDC</i> confirm F | cgcttgggcaaaagtg                                               |
| EH <i>atp/BEFHAGDC</i> confirm R | gaatacatcggggtaccttg                                           |
| EH <i>arcA</i> KO F1             | <b>cactcgaggtttacata</b> lgaacaaagacgatcgaattggggatctt         |
| EH <i>arcA</i> KO F2             | gacccttgatcaattgaaatcgga <b>cactcgaggtttacat</b>               |
| EH <i>arcA</i> KO R1             | <b>ctcctgtttaagt</b> taagacttgcgatcgaattagcttcaaaag            |
| EH <i>arcA</i> KO R2             | cgataaagaattaggcatgcttaacgg <b>ctcctgtttaagtaa</b>             |
| EH <i>arcA</i> confirm F         | gttgccgaaacacctg                                               |
| EH <i>arcA</i> confirm R         | cgataacctgcgtaacg                                              |
| EH <i>gmhB</i> KO F1             | <b>cgaaacaagccttttcaggagc</b> aaaccggacgatcgaattggggatctt      |
| EH <i>gmhB</i> KO F2             | ctgogattcatgagatactagcc <b>gaacaagccttttcaggagc</b>            |
| EH <i>gmhB</i> KO R1             | <b>tattcaaccgctcacttttcgcaaaa</b> acgctgcatgataaattagcttcaaaag |
| EH <i>gmhB</i> KO R2             | agcggaaaaaatgcattttt <b>tattcaaccgctcacttttcgcaaaa</b> ac      |
| EH <i>gmhB</i> confirm F         | cttctgccagatacggg                                              |
| EH <i>gmhB</i> confirm R         | caggatttttctctcaaccg                                           |
| EH <i>ubiH</i> KO F1             | <b>caacatttgcacggtcaatactc</b> cgacgatcgaattggggatctt          |
| EH <i>ubiH</i> KO F2             | attccggcccccacaatggcgacat <b>caacatttgcacggtcaatactc</b>       |
| EH <i>ubiH</i> KO R1             | <b>aggcgctgatggcgggcgacgcg</b> gttgcgatgataaattagcttcaaaag     |
| EH <i>ubiH</i> KO R2             | gtggtgaaaaaacgacgatc <b>gaggcgctgatggcgggcgacgcgt</b>          |
| EH <i>ubiH</i> confirm F         | gtcagtagctttctgctgg                                            |
| EH <i>ubiH</i> confirm R         | catggtgctgacctg                                                |
| EH <i>wzxE</i> KO F1             | <b>ctgagttattccctg</b> atgacgatcgaattggggatctt                 |
| EH <i>wzxE</i> KO F2             | ggtgaaccagcglacgggatcaattcgctt <b>ctgagttattccctg</b>          |
| EH <i>wzxE</i> KO R1             | <b>gtgatcagtgacgtcattg</b> catgataaattagcttcaaaag              |
| EH <i>wzxE</i> KO R2             | tggtgtagatcgggatattccgata <b>gtgatcagtgacgtcattg</b>           |
| EH <i>wzxE</i> confirm F         | gctggcgaagccttc                                                |
| EH <i>wzxE</i> confirm R         | cgttatcgctccaac                                                |
| EH <i>ruvA</i> KO F1             | <b>ctttacctcacaatgcag</b> cgcgcagacgatcgaattggggatctt          |
| EH <i>ruvA</i> KO F2             | ataccaggcgggtctgcttcaatcat <b>ctttacctcacaatgcag</b>           |
| EH <i>ruvA</i> KO R1             | <b>ttccagaacgaggagc</b> gtcaactgcatgataaattagcttcaaaag         |
| EH <i>ruvA</i> KO R2             | ttttattatgctggcagataatt <b>ttccagaacgaggagc</b>                |
| EH <i>ruvA</i> confirm F         | cctggatgaaaatctccatctg                                         |
| EH <i>ruvA</i> confirm R         | catgctgattaccactgtc                                            |
| EH <i>aroC</i> KO F1             | <b>agagcgattgcggttttttc</b> atagacgatcgaattggggatctt           |
| EH <i>aroC</i> KO F2             | tgctcactgaccagcagccag <b>agagcgattgcggttttttc</b> atag         |
| EH <i>aroC</i> KO R1             | <b>cacaaacaacaacatcgagc</b> cggtgcatgataaattagcttcaaaag        |
| EH <i>aroC</i> KO R2             | tcggccogtttcaaacgctcaaac <b>cacaaacaacaacatcgagc</b> cggtg     |
| EH <i>aroC</i> confirm F         | gtgogcatcacctgatag                                             |
| EH <i>aroC</i> confirm R         | catggtacatctgatagacgag                                         |
| EH <i>pdxA</i> KO F1             | <b>gactcgattgctgattgatt</b> aacatgacgatcgaattggggatctt         |
| EH <i>pdxA</i> KO F2             | acgggctaagtggccctgat <b>gactcgattgctgattgatt</b> aac           |

|                              |                                                              |
|------------------------------|--------------------------------------------------------------|
| EH <i>pdxA</i> KO R1         | <b>tcacccggcgaa</b> cccgcggttgcgatgcatgaattagctcaaaag        |
| EH <i>pdxA</i> KO R2         | ctgatgaaaccgatcgtgtgtgatc <b>acccggcgaa</b> cc               |
| EH <i>pdxA</i> confirm F     | gttcgtcgaggcgttc                                             |
| EH <i>pdxA</i> confirm R     | cagctgatggacacgc                                             |
| EH <i>apaGH</i> KO F1        | <b>gaaggagaggataaacatc</b> tgcgatcgaattgggatctt              |
| EH <i>apaGH</i> KO F2        | aacgtcgttaacggtttatcctcctc <b>gaaggagaggataaacatc</b>        |
| EH <i>apaGH</i> KO R1        | <b>gacaatgcccgcgaag</b> gagagcgaagcctgcatgcatgaattagctcaaaag |
| EH <i>apaGH</i> KO R2        | agctggctaattacacagc <b>gacaatgcccgcgaag</b>                  |
| EH <i>apaGH</i> confirm F    | cgcaaaactgtatcgaacg                                          |
| EH <i>apaGH</i> confirm R    | tgctgagccgatcagc                                             |
| EH <i>lpdA</i> KO F1         | <b>gggtatacattaagaggtcatgatg</b> tgcgatcgaattagctcaaaag      |
| EH <i>lpdA</i> KO F2         | cggatagaacgaccggtggacgac <b>gggtatacattaagaggtcatgatg</b>    |
| EH <i>lpdA</i> KO R1         | <b>tctgaagaacctatttctctcgc</b> ttgacgatcgaattgggatctt        |
| EH <i>lpdA</i> KO R2         | ggcctgagcgcgtttttctc <b>tgaagaacctatttctctcgc</b>            |
| EH <i>lpdA</i> confirm F     | ctggtgatgtaatcgaaaagc                                        |
| EH <i>lpdA</i> confirm R     | ggtaatgagctttgtgtaac                                         |
| EH <i>hscBA</i> KO F1        | <b>tcttggcatataaacctcgtc</b> acggagacgatcgaattgggatctt       |
| EH <i>hscBA</i> KO F2        | ccgcatgaggcaaaattaca <b>cttggcatataaacctcgtc</b>             |
| EH <i>hscBA</i> KO R1        | <b>acaggctcccctgag</b> attggtatgcatgcatgaattagctcaaaag       |
| EH <i>hscBA</i> KO R2        | cccgtacgcgtggggtttgtct <b>gacaggctcccctgag</b>               |
| EH <i>hscBA</i> confirm F    | gtcgaaacctcgaacgac                                           |
| EH <i>hscBA</i> confirm R    | caattcctcaacgacctc                                           |
| EH <i>sapABCDF</i> KO F1     | <b>atcgaatctaaaaccttaaaact</b> tgcgatcgaattagctcaaaag        |
| EH <i>sapABCDF</i> KO F2     | ggcgttaagtgcgatacatttgcgatcgaat <b>ctaaaaccttaaaact</b>      |
| EH <i>sapABCDF</i> KO R1     | <b>actctgctggcaagc</b> gggttacgcaacgggacgatcgaattgggatctt    |
| EH <i>sapABCDF</i> KO R2     | ccgcatgccatagagggtttact <b>ctgctggcaagc</b>                  |
| EH <i>sapABCDF</i> confirm F | cctgaaagagggcgaatataatc                                      |
| EH <i>sapABCDF</i> confirm R | gagtcgacccgtcagac                                            |
| EH <i>prc</i> KO F1          | <b>cctgttgggattatttgc</b> ggagcaggacgatcgaattgggatctt        |
| EH <i>prc</i> KO F2          | aaacaggcacaatttctgt <b>cccttgggattatttgc</b>                 |
| EH <i>prc</i> KO R1          | <b>tgaacggaggc</b> cgagcctggcatgtgcatgcatgaattagctcaaaag     |
| EH <i>prc</i> KO R2          | tgtacgcgcagaacacttgttct <b>gaacggaggccgag</b>                |
| EH <i>prc</i> confirm F      | octcagtttaacaaaacgac                                         |
| EH <i>prc</i> confirm R      | cggttctgacatcaatgc                                           |
| EH <i>xerC</i> KO F1         | <b>tggagcgtggattgag</b> cgctatgtgcatgcatgaattagctcaaaag      |
| EH <i>xerC</i> KO F2         | atgcocctgatggtcctgagttg <b>ctggagcgtggattgag</b>             |
| EH <i>xerC</i> KO R1         | <b>gtaaaacgcattattccccg</b> ttggcgacgatcgaattgggatctt        |
| EH <i>xerC</i> KO R2         | tgagatctgaccgagtgggcg <b>gtaaaacgcattattccccg</b>            |
| EH <i>xerC</i> confirm F     | gccggaagccaaagc                                              |
| EH <i>xerC</i> confirm R     | cagggactgacgcag                                              |
| EH <i>proP</i> KO F1         | <b>ggctgagctacgaggaa</b> gctatgtgcatgcatgaattagctcaaaag      |

|                                  |                                                                          |
|----------------------------------|--------------------------------------------------------------------------|
| EH <i>proP</i> KO F2             | gcaaaatgcgctgfgaaacggacgggctgagctacgaggaag                               |
| EH <i>proP</i> KO R1             | <b>cggtttttatcactcgtaattctcggaacgatcgaattgggatctt</b>                    |
| EH <i>proP</i> KO R2             | taaagaaaaccgccagcggc <b>cggtttttatcactcgtaattc</b>                       |
| EH <i>proP</i> confirm F         | cgctgglaggglaaaaagg                                                      |
| EH <i>proP</i> confirm R         | gcacgtccctgaactg                                                         |
| EH <i>pstSCABphoU</i> KO F       | tcatcgtagccacttaaaccaatgattacgaaactctgcaggagacattgcatgatcgaattagctcaaaag |
| EH <i>pstSCABphoU</i> KO R       | accgaatggtccctctccctgtgggaggggttaggggtgagggtaaaaagacgatcgaattgggatctt    |
| EH <i>pstSCABphoU</i> confirm F  | gaaccagactaaacatgcttattgtg                                               |
| EH <i>pstSCABphoU</i> confirm R  | cgatccgcacaacaagc                                                        |
| CF <i>atp/BEFHAGDC</i> KO F      | CGCGGCATACCTCGAAGGAGCAGGAGTAAAAACGTGATGGTGTAGGCTGGAGCTGCTTC              |
| CF <i>atp/BEFHAGDC</i> KO R      | CTGGAACACGACTGGCCTTTGTGCTTTTCAAGCCGGTGCATATGAATATCCTCCTTAGT              |
| CF <i>atp/BEFHAGDC</i> confirm F | GCATAAAAGTGATAAATGTGGCGTAG                                               |
| CF <i>atp/BEFHAGDC</i> confirm R | AGTGGCGCTGACTGATAAAC                                                     |
| CF <i>arnBCADTEF</i> KO F        | AAACTTCGGTAGCGTTAATGGCTTGAAGGAATAATGATGGTGTAGGCTGGAGCTGCTTC              |
| CF <i>arnBCADTEF</i> KO R        | ATGGGAGCGCCTTTACGACTGTCCGGCAGATAAATGAGCCATATGAATATCCTCCTTAGT             |
| CF <i>arnBCADTEF</i> confirm F   | TAAACCACTCCCACTGTCTTTG                                                   |
| CF <i>arnBCADTEF</i> confirm R   | CAAAAGGTGCGCTATGGAATGG                                                   |
| CF <i>gmhB</i> KO F              | GTGGCAAAGTCTGTACCCGCAATTTTCTCGACCGTGACGGTGTAGGCTGGAGCTGCTTC              |
| CF <i>gmhB</i> KO R              | TGCATTTTTGTTCAACCGCTCACCTTTTACCATAACGCATATGAATATCCTCCTTAGT               |
| CF <i>gmhB</i> confirm F         | CTGTGAGGTACGGTGAAGCC                                                     |
| CF <i>gmhB</i> confirm R         | CGGCTGTTGTGTAAGTGATTC                                                    |
| CF <i>ubiH</i> KO F              | GTGACATTGAAGCATTAAATGGCTGCGGCGGACTGCAATGATGTAGGCTGGAGCTGCTTC             |
| CF <i>ubiH</i> KO R              | TTATCAGGCCTACTCTTTAATTCGGCCTACAGTTATATATGAATATCCTCCTTAGT                 |
| CF <i>ubiH</i> confirm F         | CGGCATTGATTGAGGATGACATC                                                  |
| CF <i>ubiH</i> confirm R         | CCTGAAAATAGGACAATCAAAAACCGTAG                                            |
| CF <i>wzxE</i> KO F              | ACGGTAATTCGACCTTACTCAACTACTTCGCCTGAAATGGTGTAGGCTGGAGCTGCTTC              |
| CF <i>wzxE</i> KO R              | CGTGAATCAGTACAGTCATGCCCGCCTACGCCAGAGTAACATATGAATATCCTCCTTAGT             |
| CF <i>wzxE</i> confirm F         | GTGTTCCACTACATCCCGCTG                                                    |
| CF <i>wzxE</i> confirm R         | CTGGTGTGAAGTACCGCTG                                                      |
| CF <i>ruvA</i> KO F              | (14)                                                                     |
| CF <i>ruvA</i> KO R              | (14)                                                                     |
| CF <i>ruvA</i> confirm F         | (14)                                                                     |
| CF <i>ruvA</i> confirm R         | (14)                                                                     |
| CF <i>aroC</i> KO F              | ATTACACGCGCACATACACAACACTCATAACGGAGCCGGTGTAGGCTGGAGCTGCTTC               |
| CF <i>aroC</i> KO R              | TTACCAGCGTGGAATATCGGTCTTACCGTCCGCATTTTGCATATGAATATCCTCCTTAGT             |
| CF <i>aroC</i> confirm F         | TAACGGTATTCTGATTTGTGAAGTCGG                                              |
| CF <i>aroC</i> confirm R         | GCCAGCGCCGAAGTG                                                          |
| CF <i>pdxA</i> KO F              | AGCGCGCCAGCGCTTACGTTAAAGTTCTGAGCAACTAATGGTGTAGGCTGGAGCTGCTTC             |
| CF <i>pdxA</i> KO R              | TGATGGACTCGATTATTCATTGGTATTAAACATCATTTTCATATGAATATCCTCCTTAGT             |
| CF <i>pdxA</i> confirm F         | ACTCCTCTTTCGGTTGGCATC                                                    |
| CF <i>pdxA</i> confirm R         | GTTCAATGACCGTGAGCTTGTGTC                                                 |



|                                 |                                                               |
|---------------------------------|---------------------------------------------------------------|
| CF <i>apaGH</i> KO F            | ACTATCTGT CAGAAAACGCGCCATCGAAGGAGAGTTAAACGTGTAGGCTGGAGCTGCTTC |
| CF <i>apaGH</i> KO R            | GTAGGCCTGATAAGCGTAGCGCCATCAGGCATAAATCTCCATATGAATATCCTCCTTAGT  |
| CF <i>apaGH</i> confirm F       | CGCCAGCGCCTAAAGTTGATTC                                        |
| CF <i>apaGH</i> confirm R       | AGAAGCTGTATCTGACGCACATTG                                      |
| CF <i>lpdA</i> KO F             | GACCCGGTGGACGACGGGTATAAATTAAGAGGTCATGATGGTGTAGGCTGGAGCTGCTTC  |
| CF <i>lpdA</i> KO R             | AAACGCCTCCGAAGAGCGTTTTTCACAAAAGCGGGAAGACATATGAATATCCTCCTTAGT  |
| CF <i>lpdA</i> confirm F        | TCATGAAGTCAGTGAGGTTATTGTGC                                    |
| CF <i>lpdA</i> confirm R        | GTCCGCAATCATGCCAAC                                            |
| CF <i>hscBA</i> KO F            | CCCGTGAAACAACAGAGAATCGATGCCCTGAGAATGTTATGGTGTAGGCTGGAGCTGCTTC |
| CF <i>hscBA</i> KO R            | AAAAATAACAATCTTTGGCATATTAACCTCGTCCACAGACATATGAATATCCTCCTTAGT  |
| CF <i>hscBA</i> confirm F       | GGTACGCAGTTAGATTTTCGTCAAAG                                    |
| CF <i>hscBA</i> confirm R       | CCTTCACGTACGATGCAGTGG                                         |
| CF <i>sapABCDF</i> KO F         | TTAGTAAGATAGCCTCTTTATATAATCCATTAATAATTATGGTGTAGGCTGGAGCTGCTTC |
| CF <i>sapABCDF</i> KO R         | GATGGCAGAATGCCCGGTTAAGGGGCGAGTCGTTGCATATGAATATCCTCCTTAGT      |
| CF <i>sapABCDF</i> confirm F    | CGCGTTTTATAGCAAGTCAGATGGG                                     |
| CF <i>sapABCDF</i> confirm R    | CAACTGTGCGACGAGGCCAG                                          |
| CF <i>prc</i> KO F              | GCAGAACACCTGGTGTCTGAAACGGAGGCCAGGCCTGGCGTGTAGGCTGGAGCTGCTTC   |
| CF <i>prc</i> KO R              | TGTTAAAAAACAGGCACAATTTCTGTGCCTGTTCCGAGGATATGAATATCCTCCTTAGT   |
| CF <i>prc</i> confirm F         | GGATGCCACCATTAGAAATCAC                                        |
| CF <i>prc</i> confirm R         | CTTATGACTATTTCAAGCATCCATAGGT                                  |
| CF <i>xerC</i> KO F             | GTTGCCGGAGCTGCTGGAGCGCTGGATTGAACGCGTATGAGTGTAGGCTGGAGCTGCTTC  |
| CF <i>xerC</i> KO R             | CCAAAGGCCGGTAAAAACGCATTATTTCCCGCTTTGGCCATATGAATATCCTCCTTAGT   |
| CF <i>xerC</i> confirm F        | GAATTGCTGGTCATGATGCCGGAG                                      |
| CF <i>xerC</i> confirm R        | GGTGACGCCATTGGGTAACATC                                        |
| CF <i>proP</i> KO F             | ACTGGAGCGTGACAGGGCTAAGTCTATGAGGACGAGATGGTGTAGGCTGGAGCTGCTTC   |
| CF <i>proP</i> KO R             | GTAGGCCTAAAAGCTGCGTGCCATCAGGCAATGACACGACATATGAATATCCTCCTTAGT  |
| CF <i>proP</i> confirm F        | GGTCATTAACCGCCAATCAGG                                         |
| CF <i>proP</i> confirm R        | GCACACGGTGGTCAAACCTTC                                         |
| CF <i>psiSCABphoU</i> KO F      | TCAAACAACGATTTACGAAAACCGTGCGAGGACATTATGGTGTAGGCTGGAGCTGCTTC   |
| CF <i>psiSCABphoU</i> KO R      | TGGCGCTAACGCTTATCCGGCCTACTTTCTACGTTTTTACATATGAATATCCTCCTTAGT  |
| CF <i>psiSCABphoU</i> confirm F | CCATCCGAATCCCAACGCATC                                         |
| CF <i>psiSCABphoU</i> confirm R | CCGCATAACAACCGATCGATC                                         |
| CF <i>tatC</i> KO F             | (14)                                                          |
| CF <i>tatC</i> KO R             | (14)                                                          |
| CF <i>tatC</i> confirm F        | (14)                                                          |
| CF <i>tatC</i> confirm R        | (14)                                                          |
