# Supplementary material for: Fitness factor genes conserved within the multi-species core genome of Gram-negative Enterobacterales species contribute to bacteremia pathogenesis
Source: PubMed Central journal article supplement (PMC11376589; doi:10.1371/journal.ppat.1012495), 2024-08-23
Supplement: ppat.1012495.s009.pdf [file ppat.1012495.s009.pdf]

**Supplemental Table 2. Statistically significant *In vitro* phenotypes of fitness gene mutants.**

| Mutant              | <i>E. coli</i><br>CFT073 | <i>K.</i><br><i>pneumoniae</i><br>KPPR1 | <i>C.</i><br><i>freundii</i><br>UMH14 | <i>S.</i><br><i>marcescens</i><br>UMH9 | <i>E.</i><br><i>hormaechei</i><br>UM_CRE_14 |
|---------------------|--------------------------|-----------------------------------------|---------------------------------------|----------------------------------------|---------------------------------------------|
| <i>apaGH</i>        |                          |                                         |                                       |                                        |                                             |
| <i>arcA</i>         | SC <sup>a</sup>          | SC                                      | SC                                    | SC                                     | SC                                          |
| <i>arnBCADTEF</i>   | PB                       | PB, LPS-M                               | PB                                    | PB, LPS-M                              | - <sup>b</sup>                              |
| <i>aroC</i>         | LowSid                   | LowSid                                  | LowSid                                | LowSid                                 |                                             |
| <i>atpIBEFHAGDC</i> |                          |                                         |                                       |                                        |                                             |
| <i>gmhB</i>         | BS                       |                                         |                                       |                                        |                                             |
| <i>hscBA</i>        |                          |                                         |                                       |                                        |                                             |
| <i>lpdA</i>         |                          |                                         |                                       |                                        |                                             |
| <i>pdxA</i>         |                          |                                         |                                       |                                        |                                             |
| <i>prc</i>          | SS                       | SS                                      | SS, OS                                | SS, OS                                 | SS                                          |
| <i>proP</i>         |                          |                                         |                                       |                                        |                                             |
| <i>pstSCABphoU</i>  | AP                       | AP                                      | AP                                    | AP                                     |                                             |
| <i>ruvA</i>         | BS, CS                   | BS, CS                                  | CS                                    | CS                                     | CS                                          |
| <i>sapABCD</i>      |                          |                                         |                                       |                                        |                                             |
| <i>tatC</i>         |                          | BS                                      | BS                                    | PL                                     |                                             |
| <i>ubiH</i>         |                          |                                         |                                       |                                        |                                             |
| <i>wzxE</i>         | SS, PB,<br>OS, BS        | SS, OS                                  | PB, BS                                | SS, PB,<br>OS, BS                      | SS, PB, OS                                  |
| <i>xerC</i>         | CS                       | CS                                      | CS                                    | CS                                     |                                             |

<sup>a</sup>**Abbreviations:**

**SS**, human serum sensitivity; **PB**, polymyxin B sensitivity; **OS**, osmotic stress sensitivity; **BS**, bile salt sensitivity; **AP**, alkaline phosphatase overexpression; **LowSid**, mutation reduced siderophore activity; **SC**, small colony morphology; **CS**, ciprofloxacin susceptibility; **PL**, Tat-mediated protein localization; **LPS-M**, LPS modification.

<sup>b</sup>*arn* genes not present in *E. hormaechei* UMCRE14.
